# Supplementary material
Source: MDPI journal article supplement (https://www.mdpi.com/2076-0752/8/3/120)
Supplement: s1 [file s1]

## MACHINES SPECIAL ISSUES THEMATIC ANALYSIS

## GENERAL THEMES

- Traditional visual arts as phenomenon of long duration
- Friendlier technology via aesthetics
- Art as contributing to protection of the environment
- Expansion of the creative sphere via technology
- Machine as medium (in traditional sense of the word)
- Human/machine partnership in art production
- Machine art as healthy challenge to human imagination
- The algorithm as a significant factor
- Emergent phenomenon as a significant factor
- Artificial intelligence as a significant factor
- Machine as producing legitimate art
- Algorithmization/technification of society as a concern
- Embodied experience as critical to our understanding
- Defining / re-defining art

## SPECIFIC THEMES

- Art as requiring social intent
- Machine and artist as constructs
- Pansexuality as a new window on the machine
- Subversion of technology via comedy/satire
- The machine as the focus of a dystopian future
- Communication-based artworks as providing new insights
